# Supplementary material for: Epiregulin Promotes Lung Metastasis of Salivary Adenoid Cystic Carcinoma
Source: PubMed Central journal article supplement — Theranostics. 2017 Aug 23;7(15):3700–14. doi: 10.7150/thno.19712 (PMC5667342; doi:10.7150/thno.19712), 2017-08-23
Supplement: thnov07p3700s1.pdf [file thnov07p3700s1.pdf]

## Supplementary data

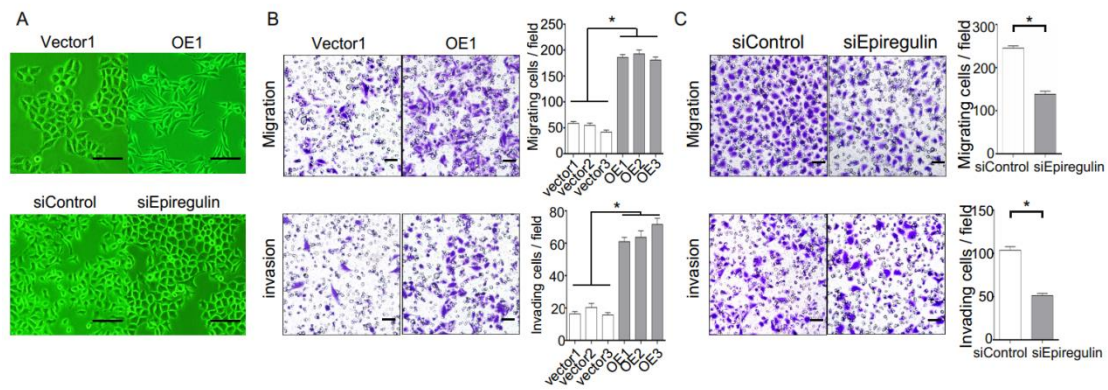

Figure S1 Epiregulin induces a prometastatic phenotype in SACC cells.

(A) Phase-contrast photomicrographs showing morphological changes in epiregulin-overexpressing OE cells and siEpiregulin cells compared to controls. Scale bar = 100  $\mu\text{m}$ . (B, C) Migration and invasion assays (scale bar = 50  $\mu\text{m}$ ) in OE cells and siEpiregulin cells compared to controls.

A

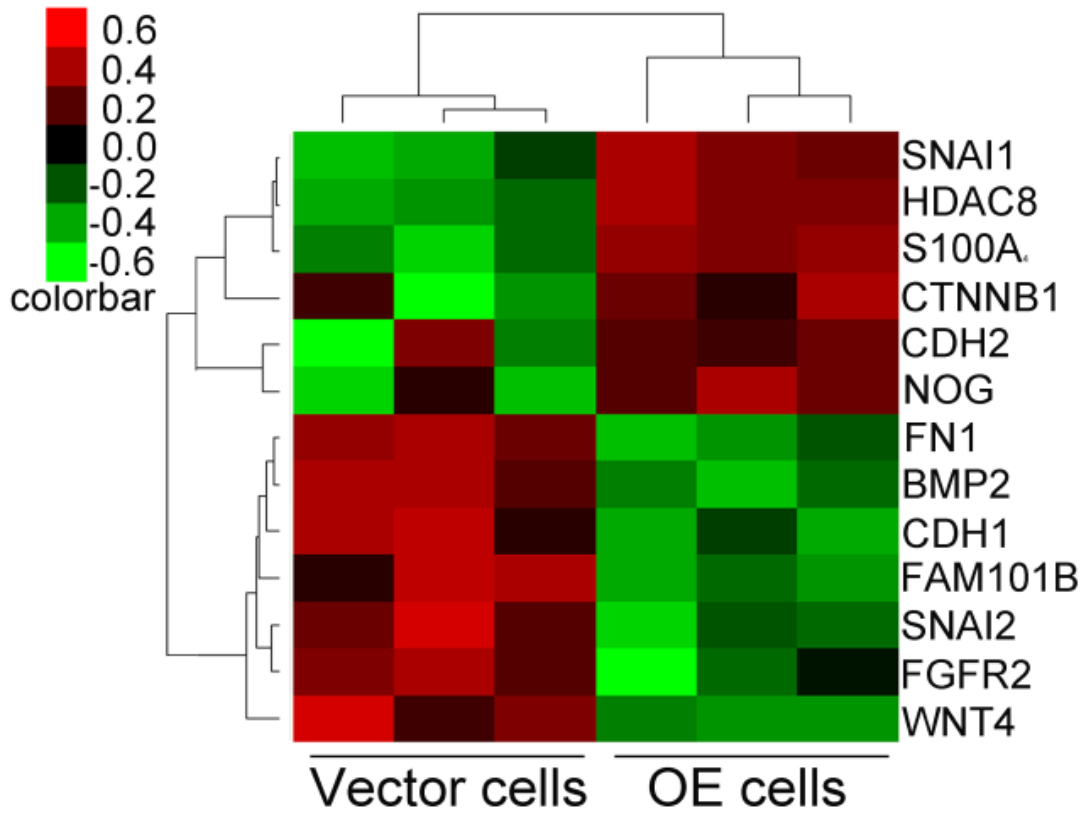

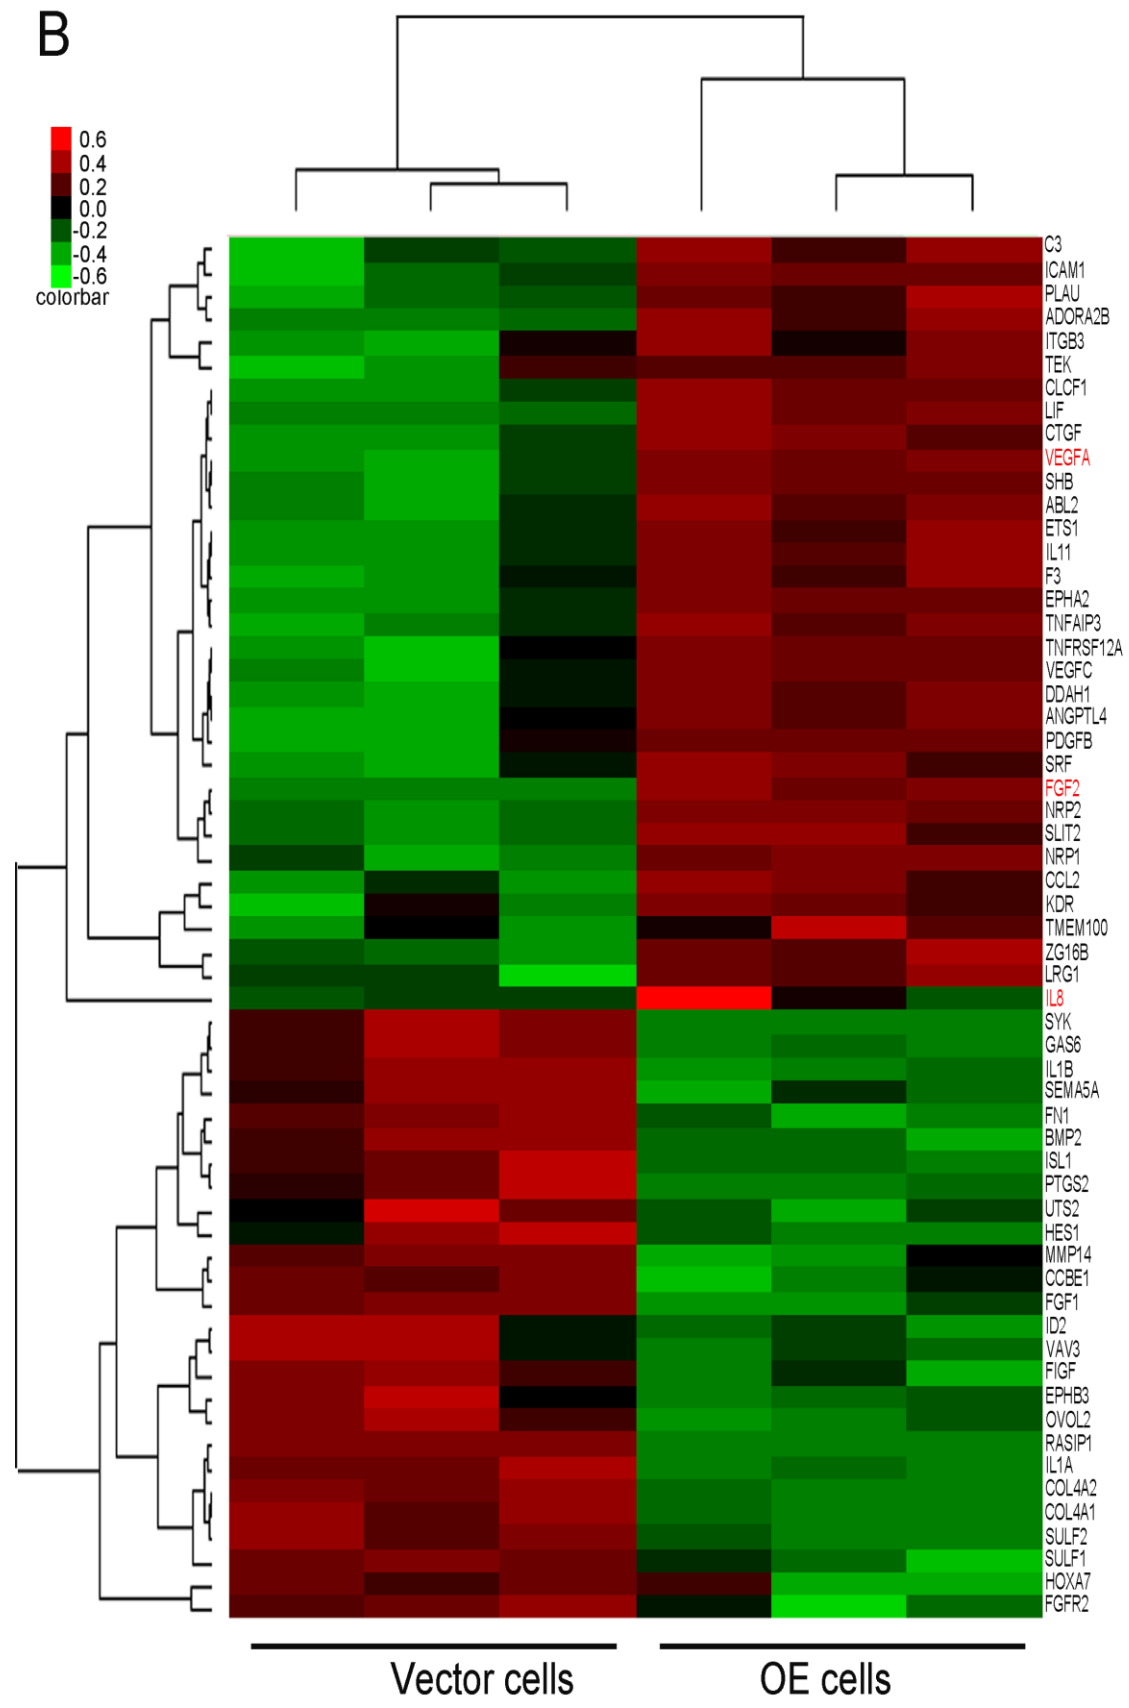

**Figure S2: Heatmap analysis of microarray data showed differentially expressed genes related to EMT (A) and angiogenesis (B) processes in OE cells. Red square: up-regulated genes; green square: down-regulated genes.**

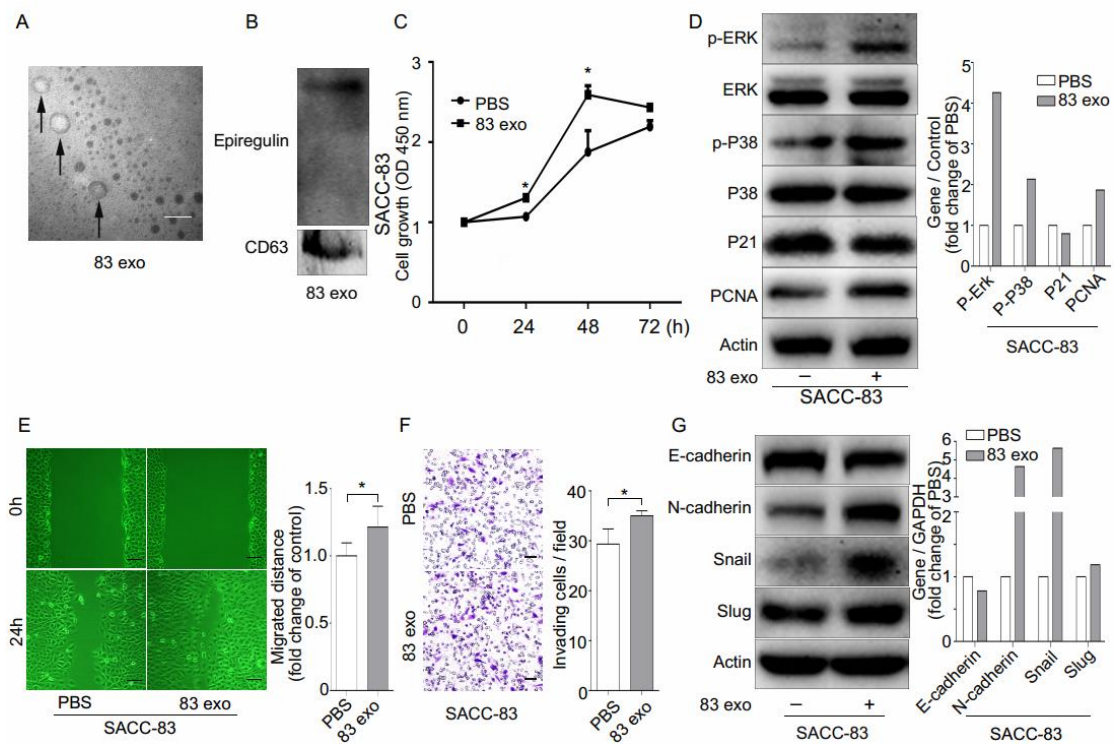

**Figure S3: Exosomes derived from SACC-83 cells (83 exo) enhance the proliferation, migration, and invasion of SACC cells.** (A) Electron microscopy image of 83 exo (approximately 30–100 nm in diameter; scale bar = 100 nm). (B) Western blot analysis of the exosomal marker CD63 and epiregulin (mainly full-length proepiregulin) in 83 exo. (C) CCK8 cell proliferation assays of SACC-83 cells after co-culturing with 83 exo for 24 hours, 48 hours, and 72 hours. (D) Western blot assay of the expression of phosphorylated (p)-ERK, ERK, p-P38, P38, P21, and PCNA in SACC-83 cells after incubation with or without 83 exo. (E) Migration of SACC-83 cells in a wound healing assay, and quantification of the scratch closure 16 hours incubation with or without 83 exo. Scale bar = 100  $\mu$ m. (F) Representative images and quantification of the invasive ability of SACC-83 cells (i.e., ability to penetrate the membrane with matrigel) after incubation with or without 83 exo. Scale bar = 50  $\mu$ m. (G) Western blot assay indicating the expression of E-cadherin, N-cadherin, Slug, and Snail in SACC-83 cells after incubation with or without 83 exo. All data are expressed as mean  $\pm$  SD, \* $P$  < 0.05.

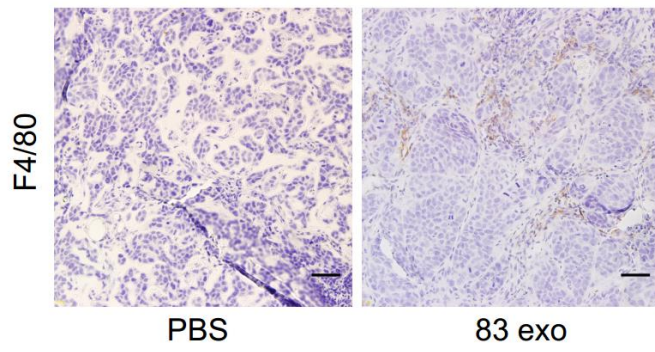

**Figure S4: Exosomes derived from SACC-83 cells induce aberrant distribution of macrophages *in vivo*, as shown via immunohistochemical staining for F4/80.**

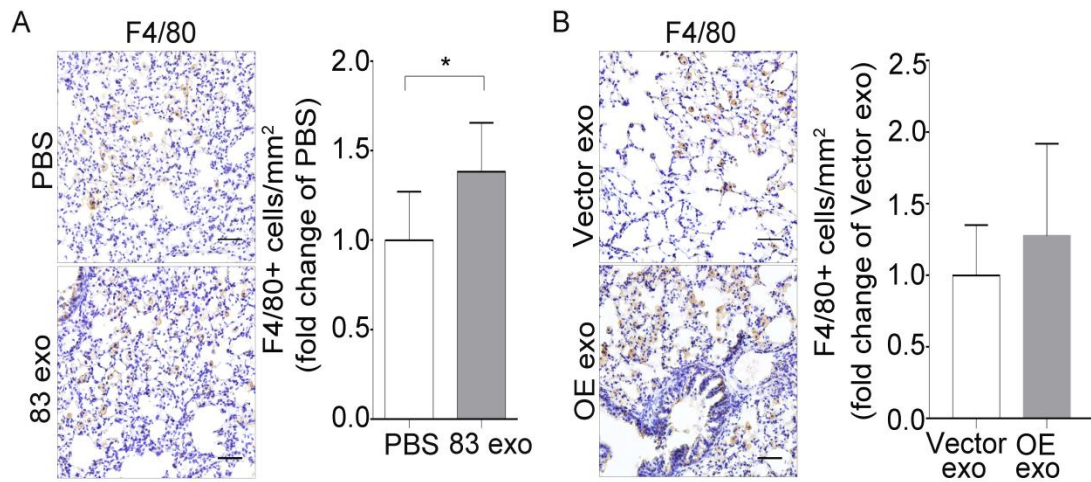

**Figure S5: Effects of exosomes on the distribution of macrophages *in vivo*, as shown via immunohistochemical staining for F4/80.** (A) Representative images of F4/80 immunohistochemical staining of mouse lung in the *in vivo* mouse lung metastasis model with or without 83 exo treatment (n = 6 per group). (B) Representative images of F4/80 immunohistochemical staining of mouse lung in the *in vivo* mouse lung metastasis model with Vector exo or OE exo treatment (n = 7 per group). The data are showed as mean  $\pm$  SD. \*,  $P < 0.05$ .

**Table S1:** Primers for qRT-PCR.

| Gene            | Primer sequence<br>(5' to 3')                          |
|-----------------|--------------------------------------------------------|
| qRT-PCR (human) |                                                        |
| Epiregulin      | F: ATCCTGGCATGTGCTAGGGT<br>R: GTGCTCCAGAGGTCAGCCAT     |
| GLI1            | F: CTGGACTTTGTGGCTAT<br>R: ATGCGATCTGTGATGGA           |
| E-cadherin      | F: GACCGGTGCAATCTTCAAA<br>R: TTGACGCCGAGAGCTACAC       |
| Fibronectin     | F: CAAACTCCGTCACCCTCAGT<br>R: GGTGCCAGTGGTTTCTTGTT     |
| Snail           | F: CCCAATCGGAAGCCTAACT<br>R: GCTGGAAGGTAAACTCTGGATTAGA |
| Slug            | F: TTCGGACCCACACATTACCT<br>R: TTGACGCCGAGAGCTACAC      |
| VEGFA           | F: TTCTGAGTTGCCCAGGAGAC<br>R: GGAGCAGGAAGAGGATGAGG     |
| FGF-2           | F: TCAGTCTTCGCCAGGTCATT<br>R: GTATTCGGCAACAGCACACA     |
| IL-8            | F: TTTTGCCAAGGAGTGCTAAAGA<br>R: AACCTCTGCACCCAGTTTTC   |
| VEGFR1          | F: CTATCACTGCAAAGCCACCA<br>R: GCCACACAGGTGCATGTTAG     |
| VEGFR2          | F: CAGCATCACCAGTAGCCAGA<br>R: GATGCTCCAAGGTCAGGAAG     |
| FGFR1           | F: CGGGACAGACTGGTCTTAGG<br>R: CTTCACAGCCACTTTGGTCA     |
| FGFR2           | F: AAGCTGCTGAAGGAAGGACA<br>R: TGCTTGAACGTTGGTCTCTG     |
| GAPDH           | F: CCATGGAGAAGGCTGGG<br>R: CAAAGTTGTCATGGATGACC        |
| qRT-PCR (mouse) |                                                        |
| VEGFA           | F: GAGCAGAAGTCCCATGAAGTGA<br>R: CACAGGACGGCTTGAAGATGT  |
| FGF-2           | F: AAGGGAGTGTGTGCCAACC<br>R: GCCCAGTTCGTTTCAGTGC       |
| IL-8            | F: TTTCCACCGGCAATGAAG<br>R: TAGAGGTCTCCCGAATTGGA       |
| GAPDH           | F: GTGTTTCCTCGTCCCGTAGA<br>R: AATCTCCACTTTGCCACTGC     |
